# Supplementary material for: Persistent hypertension among postpartum women with comorbid HIV and preeclampsia in Zambia
Source: PubMed Central journal article supplement (PMC11373822; doi:10.1371/journal.pone.0309915), 2024-09-04
Supplement: pone.0309915.s003.pdf [file pone.0309915.s003.pdf]

## Human Participants Research Checklist

**Title:** Persistent hypertension among postpartum women with comorbid HIV and preeclampsia in Zambia

1. Did you obtain ethics approval for this study? **YES**

- If yes, please upload (file type “Other”) the original approval document you received from your ethics committee.

**Uploaded**

- If you did not obtain ethical approval, please explain why this was not required below.

N/A

2. If you prospectively recruited human participants for the study – for example, you conducted a clinical trial, distributed questionnaires, or obtained tissues, data or samples for the purposes of this study, please report in the Methods:

- the day, month and year of the **start and end** of the recruitment period for this study.
- whether participants provided informed consent, and if so, what type was obtained (for instance, written or verbal, and if verbal, how it was documented and witnessed). If your study included minors, state whether you obtained consent from parents or guardians. If the need for consent was waived by the ethics committee, please include this information.

**Completed**

3. If you are reporting a retrospective study of medical records or archived samples, please report in the Methods section:

- the day, month and year when the data were accessed for research purposes
- whether authors had access to information that could identify individual participants during or after data collection

N/A
